# Supplementary material for: Community Dynamics of Fungi During the Progression of Human Non-Small-Cell Lung Cancer
Source: Research Square preprint supplement (doi:10.21203/rs.3.rs-616977/v1), 2021-06-16
Supplement: Supplementary file 1 [file a016ac69052087951790fdc5.docx]

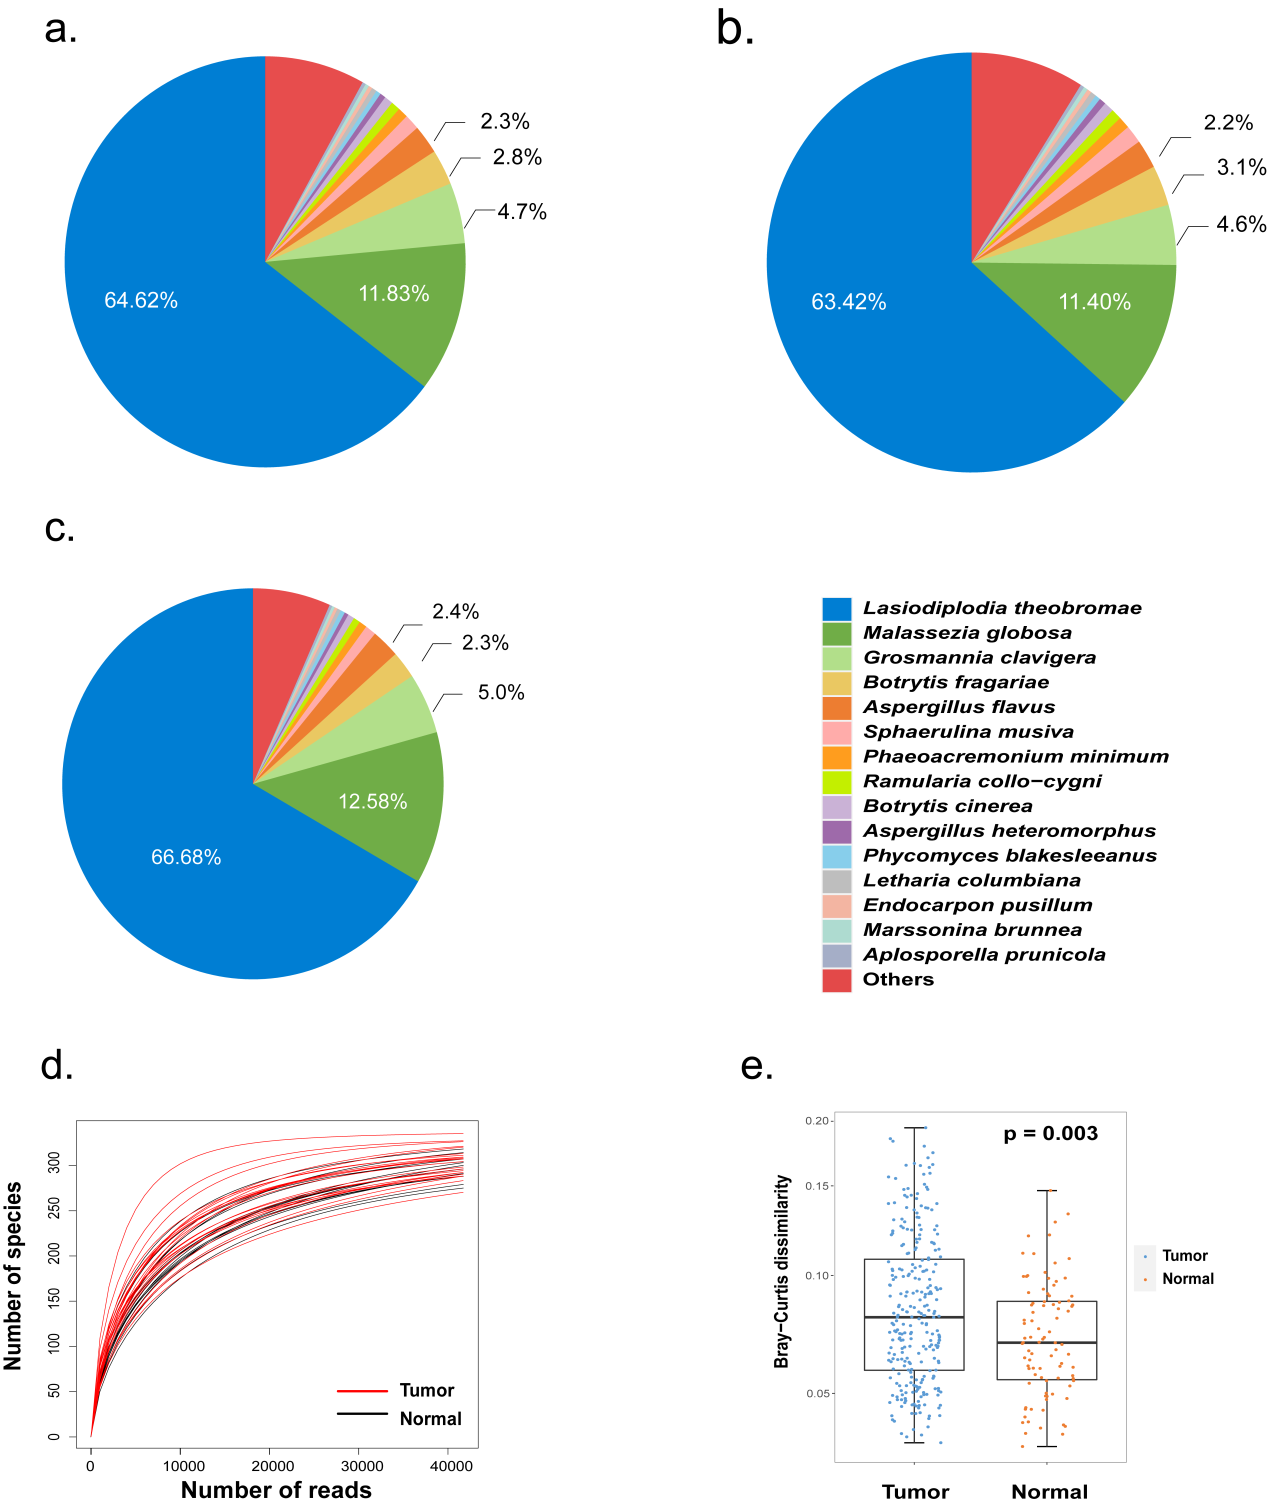


***Figure S1*** ***a.*** A pie graph which shows the fungal composition of both NSCLC and non-cancer controls. ***b.*** The fungal composition of NSCLC. ***c.*** The fungal composition of non-cancer controls. ***d.*** Species rarefaction curves in red and black indicate NSCLC and non-cancer controls, respectively. ***e.*** Differences in beta-diversity among the NSCLC and non-cancer controls groups were estimated based on a Bray–Curtis distance matrix of all 38 samples.
